# Supplementary material for: Bax-inhibiting peptide attenuates bleomycin-induced lung injury in mice
Source: PubMed Central journal article supplement (PMC5769644; doi:10.1242/bio.026005), 2017-11-14
Supplement: biolopen-6-026005-s1.pdf [file biolopen-6-026005-s1.pdf]

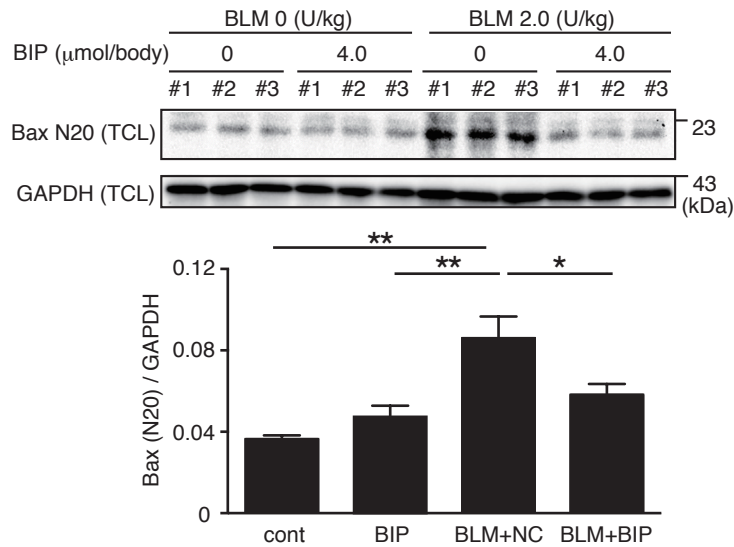

**Fig. S1 Effect of Bax-inhibiting peptide V5 on the amount of total Bax expression in vivo.**

(A) Western blot for total amount of Bax in lung tissues was performed on day 7. Data are collected from three separate experiments and are expressed as mean  $\pm$  S.E.M. \* $p < 0.05$ , \*\* $p < 0.01$ . BLM, bleomycin; NC, negative control; BIP, Bax-inhibiting peptide V5.
